# Supplementary material for: Extremely large cavity assembled by self-interlocking of distorted biconcave porphyrins
Source: Royal Society of Chemistry journal article supplement (doi:10.1039/b413082k), 2005-01-01
Supplement: b413082k.pdf [file b413082k.pdf]

# Extremely large cavity assembled by self-interlocking of distorted biconcave porphyrins

Hidemitsu Uno,<sup>\*a</sup> Hikaru Watanabe,<sup>b</sup> Yuko Yamashita<sup>b</sup> and Noboru Ono<sup>b</sup>

<sup>a</sup> Division of Synthesis and Analysis, Department of Molecular Science, Integrated Center for Sciences, Ehime University and CREST, Japan Science Technology Corporation (JST), Matsuyama 790-8577, Japan. Fax: +81-89-927-9670; Tel: +81-89-927-9660; E-mail: uno@dpc.ehime-u.ac.jp

<sup>b</sup> Department of Chemistry, Faculty of Science, Ehime University, Matsuyama 790-8577, Japan. Fax: +81-89-927-9590; Tel: +81-89-927-9610; E-mail: ononbr@dpc.ehime-u.ac.jp

In all drawings of the X-ray structure, whole molecules are shown by symmetry expansion when the molecules occupy special positions. Therefore, the molecular ratios in the figures are not necessarily identical with the molecular compositions of the crystals. In the cases that the PLATON SQUEEZE program was applied, only the Ortep drawing obtained by these results are shown. The Ortep drawings are created by Ortep-3 program and the packing views are created by Mercury program. In the case of free base porphyrin **3**, pyrrolic hydrogen atoms are placed at the all pyrrole moieties with a half occupancy. Bond lengths, angles, and torsion angles are shown in the separated CIF files. The crystallographic data for the individual crystals are summarised in Table S1. The X-ray measurements were performed by Rigaku Raxis-IV (IP) or Rigaku AFC7R-Mercury CCD. The reflection data were created by CrystalClear and processed by CrystalStructure. The structures were refined by teXsan 1.11 or CrystalStructure 3.5.1-3.6.0, in which Shelx-97 programs were installed.

## X-ray structure of 5,10,15,20-Tetraphenyl-2,3,7,8;12,13;17,18-tetrakis(9,10-dihydro-9,10-anthraceno)porphyrinato zinc (16)

The single crystals were obtained by slow evaporation of the solvent from a toluene solution. The crystal used for X-ray analysis contained 7 molecules of solvent toluene in the unit cell. As the solvent molecules were not properly modeled, the structure was obtained without the solvent molecules by several cycles of Shelxl-97 and PLATON SQUEEZE refinements

### X-ray data for TPTAP-Zn·7PhMe

|                                                               |                                                                                                                                                                                                                     |
|---------------------------------------------------------------|---------------------------------------------------------------------------------------------------------------------------------------------------------------------------------------------------------------------|
| Empirical Formula                                             | C <sub>149</sub> H <sub>116</sub> N <sub>4</sub> Zn                                                                                                                                                                 |
| Formula Weight                                                | 2027.96                                                                                                                                                                                                             |
| Crystal Colour                                                | red                                                                                                                                                                                                                 |
| Habit                                                         | block                                                                                                                                                                                                               |
| Crystal Dimensions                                            | 0.55 x 0.20 x 0.20 mm                                                                                                                                                                                               |
| Crystal System                                                | triclinic                                                                                                                                                                                                           |
| Lattice Type                                                  | Primitive                                                                                                                                                                                                           |
| No. of Reflections Used for UnitCell Determination (2θ range) | 11247 (6.0 - 55.0°)                                                                                                                                                                                                 |
| Lattice Parameters                                            | $a = 10.263(1) \text{ \AA}$<br>$b = 16.066(2) \text{ \AA}$<br>$c = 16.779(2) \text{ \AA}$<br>$\alpha = 82.544(5)^\circ$<br>$\beta = 85.022(6)^\circ$<br>$\gamma = 80.666(6)^\circ$<br>$V = 2700.8(5) \text{ \AA}^3$ |
| Space Group                                                   | $P-1$ (#2)                                                                                                                                                                                                          |
| Z value                                                       | 1                                                                                                                                                                                                                   |
| D <sub>calc</sub>                                             | 1.247 g/cm <sup>3</sup>                                                                                                                                                                                             |
| F <sub>000</sub>                                              | 1068.00                                                                                                                                                                                                             |
| μ(MoKα)                                                       | 2.86 cm <sup>-1</sup>                                                                                                                                                                                               |
| Diffractionmeter                                              | MERCURY                                                                                                                                                                                                             |
| Radiation                                                     | MoKα (λ = 0.71070 Å)<br>graphite monochromated                                                                                                                                                                      |
| Take-off Angle                                                | 2.8°                                                                                                                                                                                                                |
| Detector Aperture                                             | 2.0 - 2.5 mm horizontal                                                                                                                                                                                             |
| Voltage, Current                                              | 50 kV, 100 mA                                                                                                                                                                                                       |
| Temperature                                                   | -100.0 °C                                                                                                                                                                                                           |
| Scan Type                                                     | ω                                                                                                                                                                                                                   |
| 2θ <sub>max</sub>                                             | 55.0°                                                                                                                                                                                                               |

|                             |                                                                                                                         |
|-----------------------------|-------------------------------------------------------------------------------------------------------------------------|
| No. of Reflections Measured | Total: 27419<br>Unique: 11968 (R <sub>int</sub> = 0.030)                                                                |
| Corrections                 | Lorentz-polarization<br>Absorption<br>(trans. factors: 0.8586 -0.9450)                                                  |
| Structure Solution          | Direct Methods (SIR97)                                                                                                  |
| Refinement                  | Full-matrix least-squares on F <sup>2</sup><br>Shelxl-97<br>PLATON SQUEEZE                                              |
| Function Minimized          | $\sum w (F_o^2 - F_c^2)^2$                                                                                              |
| Least Squares Weights       | $w = 1 / [ \sigma^2 (F_o^2) + (0.1093 \cdot P)^2 + 0.0000 \cdot P ]$<br>where $P = (\text{Max}(F_o^2, 0) + 2F_c^2) / 3$ |
| Anomalous Dispersion        | All non-hydrogen atoms                                                                                                  |
| No. Observations (All)      | 11968                                                                                                                   |
| No. Variables               | 476                                                                                                                     |
| Refl./Param. Ratio          | 25.14                                                                                                                   |
| R (All)                     | 0.055                                                                                                                   |
| R1 (I > 2.00σ(I))           | 0.048                                                                                                                   |
| wR2 (All)                   | 0.152                                                                                                                   |
| Goodness of Fit Indicator   | 1.001                                                                                                                   |
| Max Shift/Error             | 0.000                                                                                                                   |
| Max. peak                   | 0.32 e <sup>-</sup> /Å <sup>3</sup>                                                                                     |
| Min. peak                   | -0.32 e <sup>-</sup> /Å <sup>3</sup>                                                                                    |

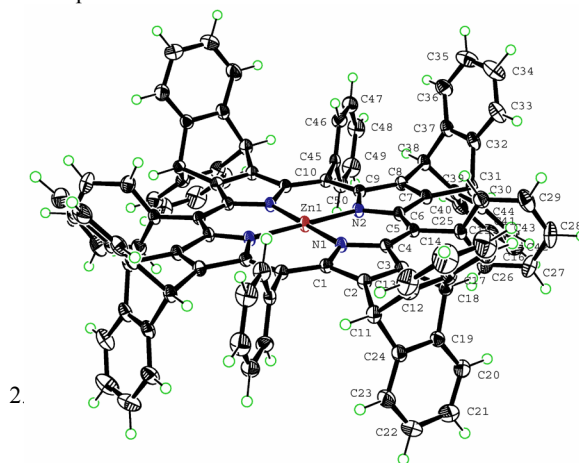

Figure S1. Ortep drawing of 16·7PhMe (the refined structure is 16)

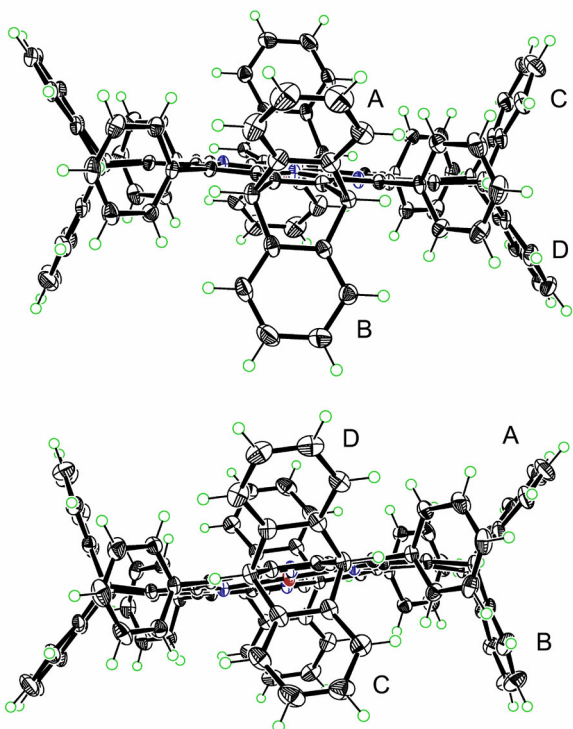

**Figure S2.** Ortep side views of TPTAP-Zn. The angles toward the porphyrin mean plane are as follows:

|                            |           |
|----------------------------|-----------|
| Tilting angle of pyrrole 1 | 3.95(5)°  |
| Tilting angle of pyrrole 2 | 2.92(5)°  |
| Benzene moiety A           | 45.05(5)° |
| Benzene moiety B           | 77.70(5)° |
| Benzene moiety C           | 69.92(5)° |
| Benzene moiety D           | 52.44(5)° |
| 5-Phenyl                   | 82.35(5)° |
| 10-Phenyl                  | 89.54(5)° |

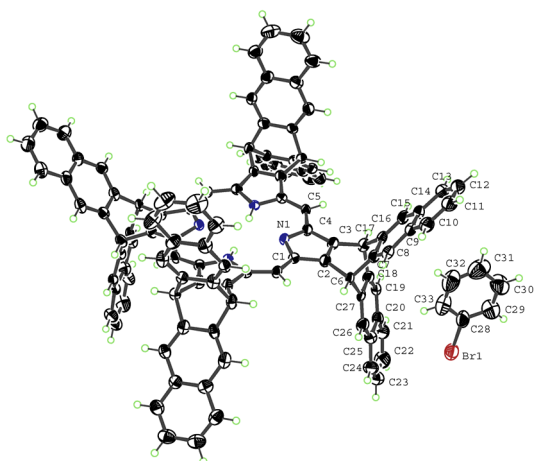

**Figure S3.** Ortep drawing of 12·9PhBr (the refined structure is 12·4PhBr)

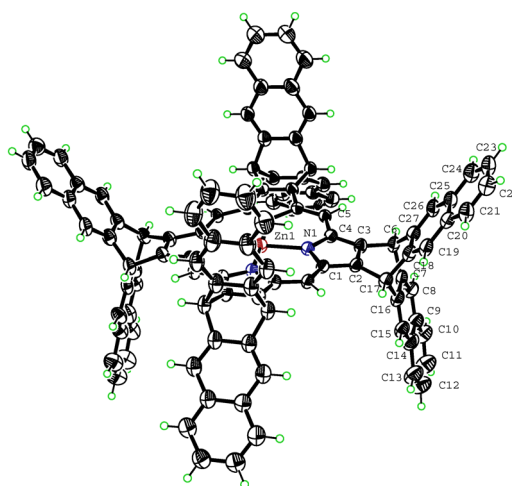

**Figure S4.** Ortep drawing of 13·10PhCl (the refined structure is 13)

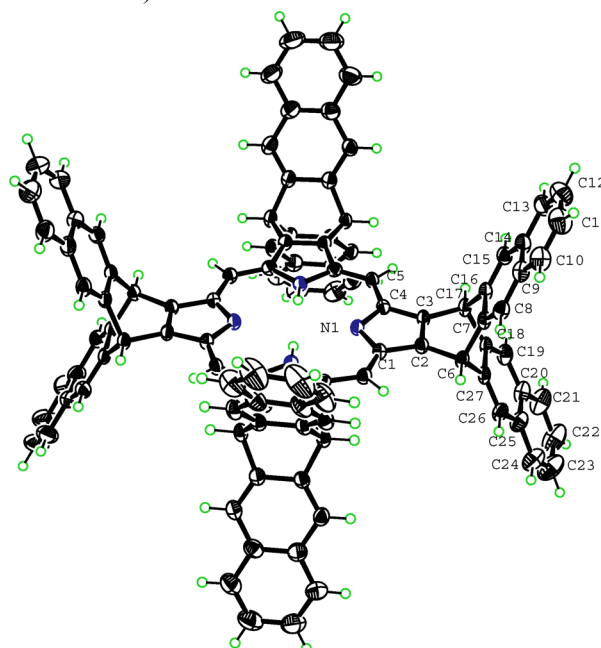

**Figure S5.** Ortep drawing of 12·12PhH (the refined structure is 12)

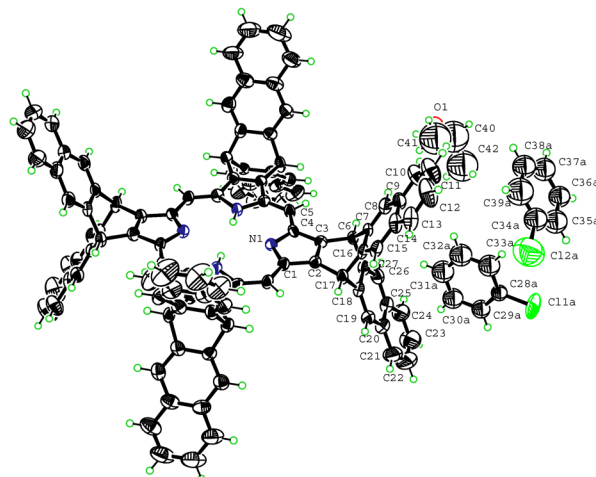

**Figure S6.** Ortep drawing of 12·8PhCl·4*i*-PrOH

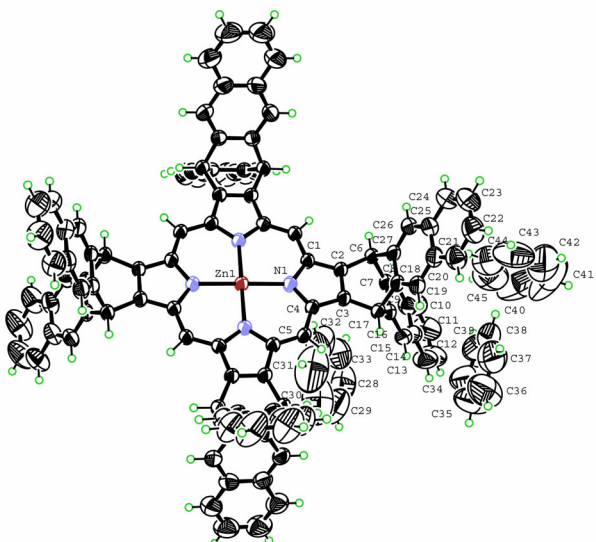

Figure S7. Ortep drawing of **13**·12PhH

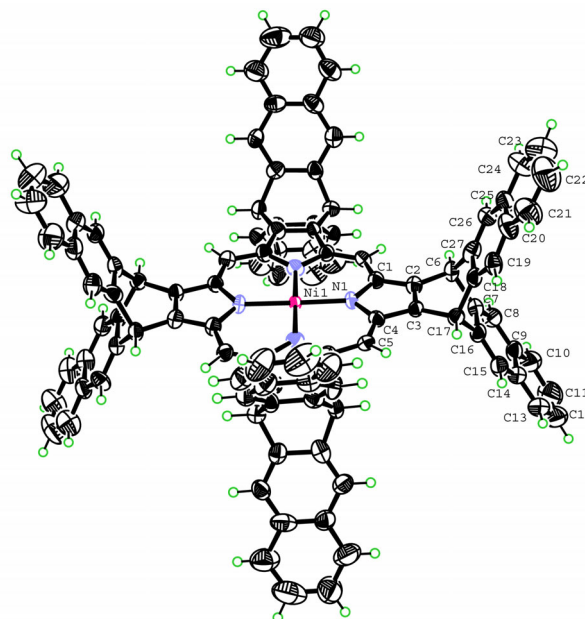

Figure S9. Ortep drawing of **14**·8PhCl·4*i*-PrOH (the refined structure is **14**)

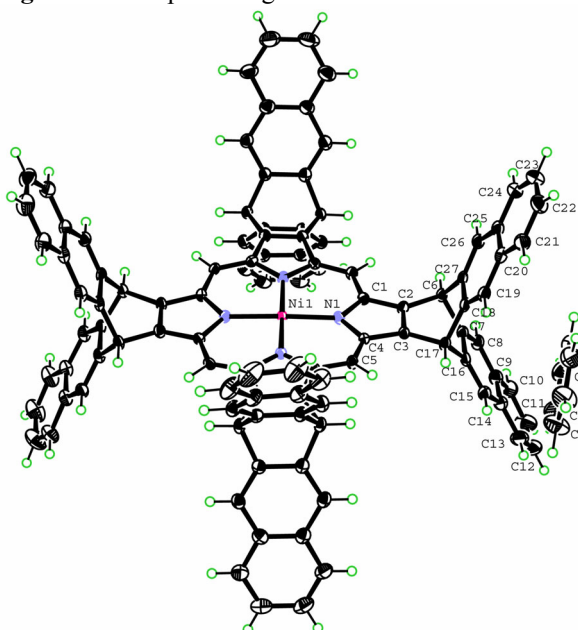

Figure S8. Ortep drawing of **14**·12PhH (the refined structure is **14**·4PhH)

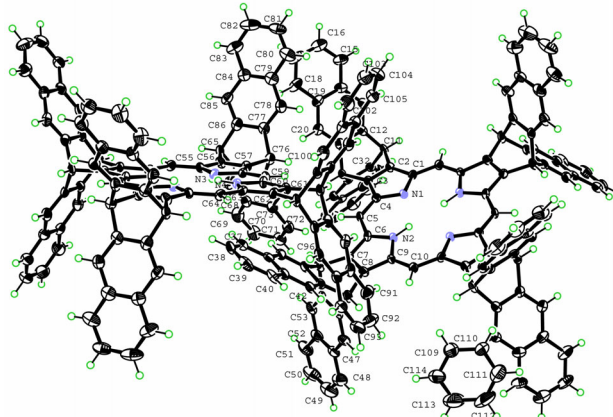

Figure S10. Ortep drawing of **12**·2PhH·7CH<sub>2</sub>Cl<sub>2</sub> (the refined structure is **12**·PhH)

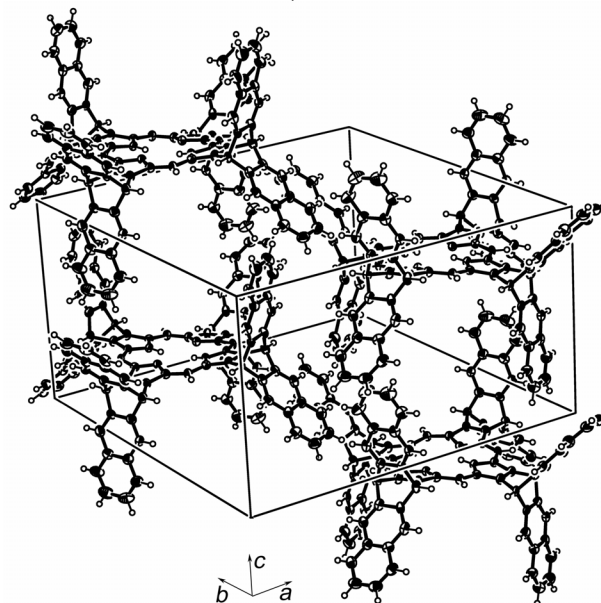

Figure S11. Packing diagram of **12**·9PhBr (the refined structure is **12**)



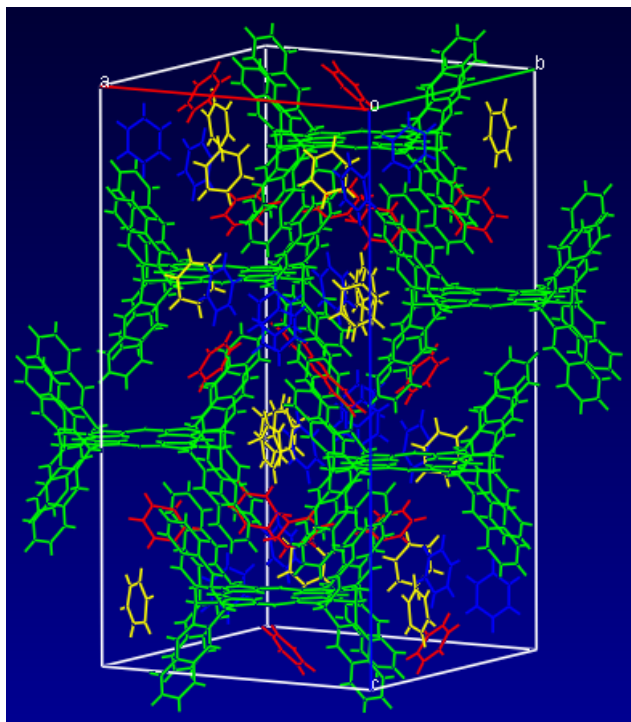

Figure S12. Packing diagram of **12**·12PhH. Green: **12** and Red, Blue and Yellow: PhH.

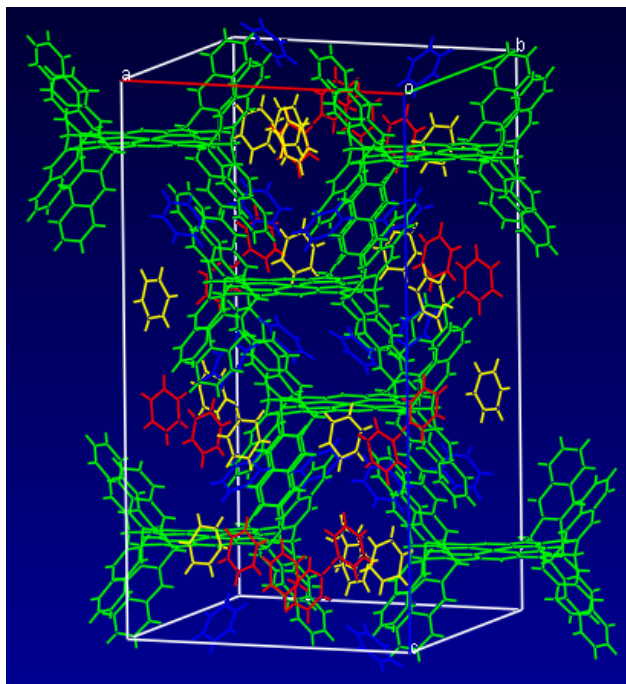

Figure S14. Packing diagram of **13**·12PhH. Green: **13** and Red, Blue and Yellow: PhH.

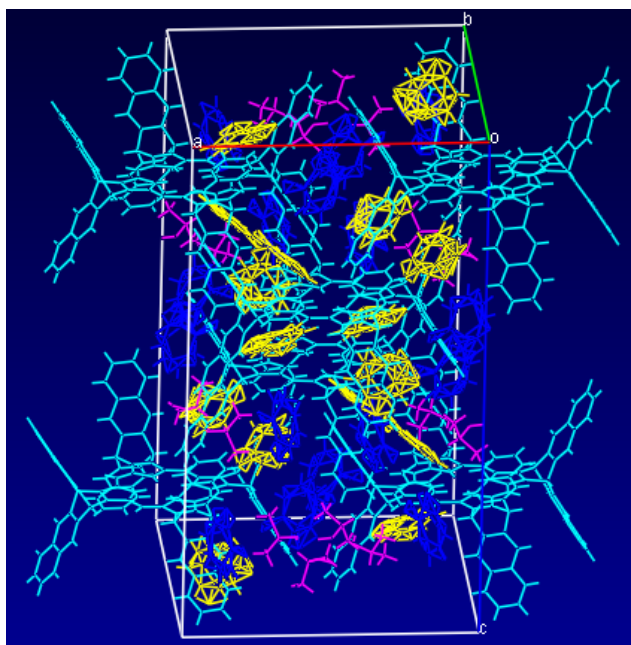

Figure S13. Packing diagram of **12**·8PhCl·4*i*-PrOH. Light blue: **12**; Blue and Yellow: disordered PhCl; and Purple: *i*-PrOH around  $-4$  symmetric position.

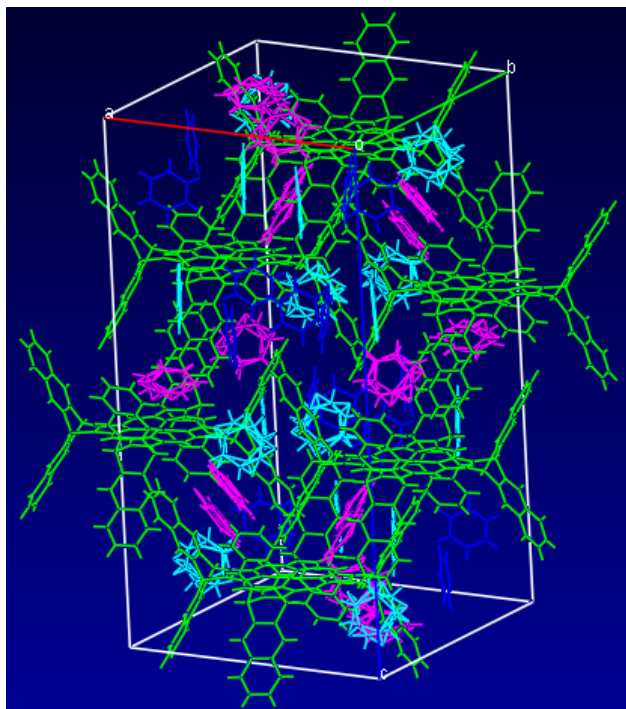

Figure S15. Packing diagram of **14**·12PhH. Green: **14**; Blue: PhH refined in the PLATON SQUEEZE and Shelxl-97 refinement; and Purple and Yellow: disordered PhH.
